# Supplementary material for: Impairment of odor discrimination and identification is associated with disability progression and gray matter atrophy of the olfactory system in MS
Source: PubMed Central journal article supplement — Mult Scler. 2019 Mar 21;26(6):706–15. doi: 10.1177/1352458519838205 (PMC7232781; doi:10.1177/1352458519838205), 2019-03-21
Supplement: MSJ838205_supplementary_figures.pdf [file MSJ838205_supplementary_figures.pdf]

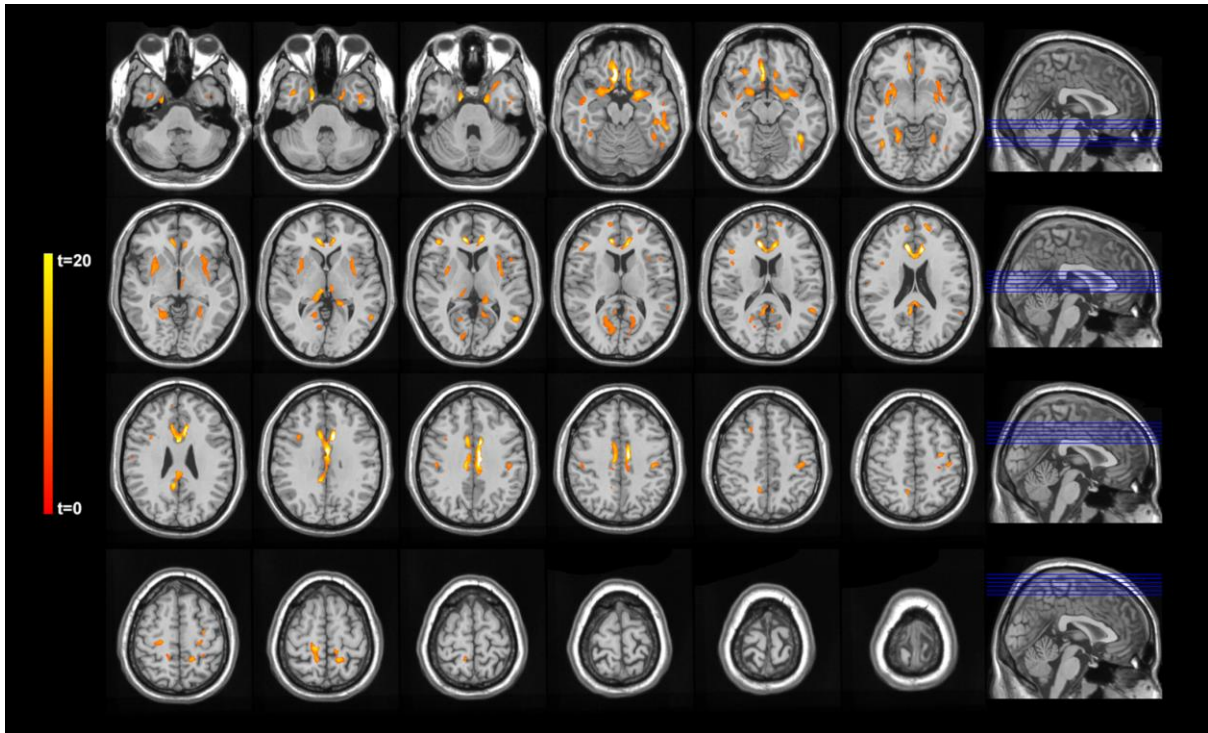

Supplemental Figure 1.

SPM (t value) axial intensity projection maps showing areas of significant decreases of gray matter concentration (color code, yellow to orange) in a cohort of patients with multiple sclerosis compared to healthy control subjects rendered on to a stereotactically normalized MRI scan in MNI space.

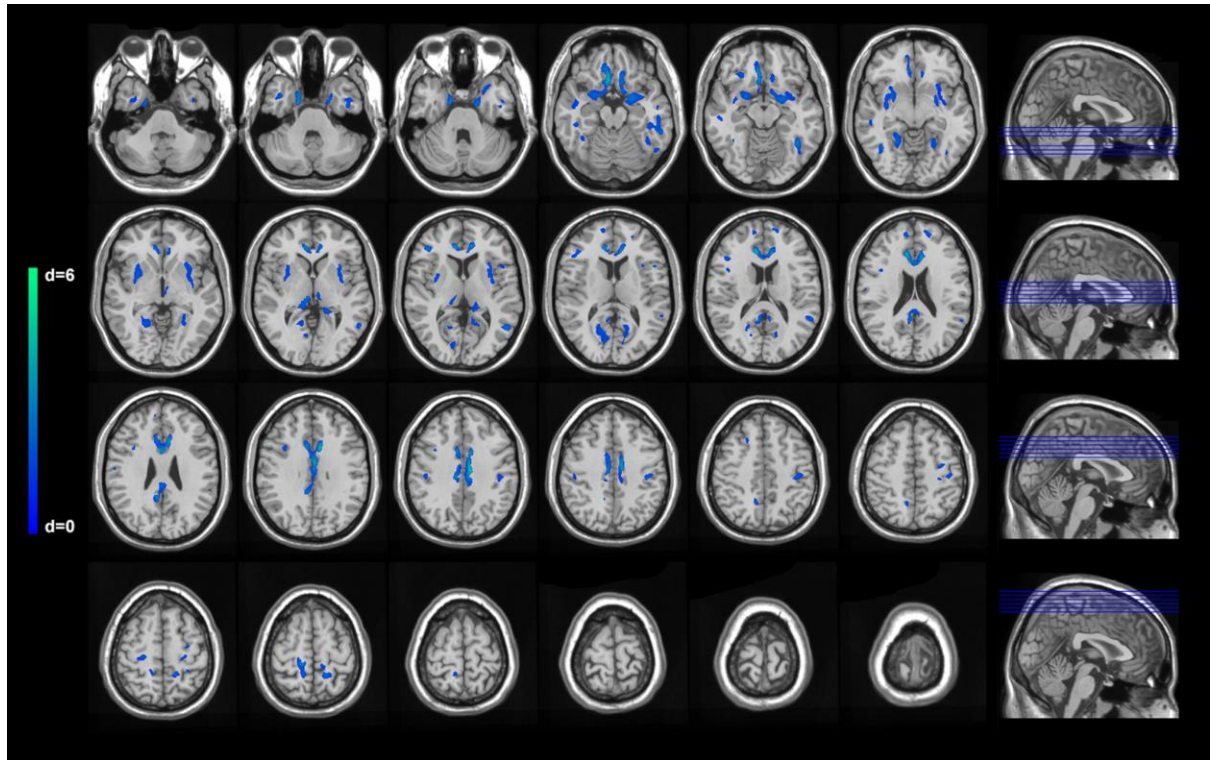

Supplemental Figure 2.

SPM (Cohen's d value) axial intensity projection maps showing the effect sizes of areas representing significant decreases of gray matter concentration (color code, turquoise to blue) in a cohort of patients with multiple sclerosis compared to healthy control subjects rendered on to a stereotactically normalized MRI scan in MNI space.
