# Supplementary material for: Impairment of odor discrimination and identification is associated with disability progression and gray matter atrophy of the olfactory system in MS
Source: PubMed Central journal article supplement — Mult Scler. 2019 Mar 21;26(6):706–15. doi: 10.1177/1352458519838205 (PMC7232781; doi:10.1177/1352458519838205), 2019-03-21
Supplement: MSJ838205_supplementary_table_1.pdf [file MSJ838205_supplementary_table_1.pdf]

**Supplemental Table 1. SPM findings showing the locations of significant changes of gray matter concentration in patients with MS compared to age and sex-matched healthy controls**

| Cerebral region                                                                                | Cluster size<br>(mm <sup>3</sup> ) | MNI<br>co-ordinates |     |     | T<br>value | Cohen's d | Height<br>threshold |
|------------------------------------------------------------------------------------------------|------------------------------------|---------------------|-----|-----|------------|-----------|---------------------|
|                                                                                                |                                    | x                   | y   | z   |            |           |                     |
| Left cingulate mid portion, BA 23                                                              | 25110                              | 7                   | -12 | 39  | 19.02      | 5.69      | 0.001               |
| Right cingulate anterior portion BA<br>24                                                      |                                    | -11                 | 34  | 18  | 16.41      | 2.29      |                     |
| Right straight gyrus, frontal<br>superior and medial orbital gyrus,<br>olfactory gyrus (BA 11) |                                    | -9                  | 25  | -19 | 16.32      | 2.8       |                     |
| Left amygdala                                                                                  |                                    | 19                  | 1   | -17 | 10.57      | 3.15      |                     |
| Left parahippocampal gyrus<br>(BA 28)                                                          |                                    | 17                  | -6  | -27 | 9.56       | 2.21      |                     |
| Left straight gyrus, frontal superior<br>and medial orbital gyrus, olfactory<br>gyrus (BA 11)  |                                    | 9                   | 24  | -17 | 9.65       | 2.88      |                     |
| Right lingual gyrus (BA 37)                                                                    |                                    | -23                 | -52 | -7  | 8.91       | 2.54      |                     |
| Right thalamus                                                                                 |                                    | -5                  | -20 | 0   | 8.49       | 2.53      |                     |
| Left lingual gyrus (BA 37)                                                                     |                                    | 23                  | -54 | -7  | 8.04       | 2.4       |                     |
| Right Putamen                                                                                  |                                    | -32                 | 1   | -5  | 7.81       | 2.33      |                     |
| Left Putamen                                                                                   |                                    | 33                  | 0   | 8   | 7.76       | 2.31      |                     |

|                                                 |      |     |     |     |       |      |
|-------------------------------------------------|------|-----|-----|-----|-------|------|
| Left temporal inferior gyrus<br>(BA 20)         | 2498 | 52  | -28 | -23 | 17.56 | 5.24 |
| Right parahippocampal gyrus<br>(BA 28)          | 518  | -17 | -3  | -30 | 12.23 | 3.65 |
| Right temporal inferior gyrus<br>(BA 20)        | 1448 | -48 | -26 | -22 | 11.39 | 3.4  |
| Right paracentral lobule                        | 725  | -14 | -32 | 64  | 10.71 | 3.19 |
| Right precuneus (BA 5)                          |      | -14 | -45 | 63  | 8.35  | 2.49 |
| Right frontal inferior gyrus (BA 45)            | 428  | -45 | 36  | 8   | 10.35 | 3.08 |
| Left parietal superior gyrus (BA 5)             | 1227 | 15  | -45 | 61  | 10.31 | 3.07 |
| Left frontal superior gyrus (BA 10)             | 266  | 13  | 58  | 20  | 8.54  | 2.55 |
| Left precentral gyrus (BA 6)                    | 152  | 31  | -9  | 53  | 8.33  | 2.48 |
| Right frontal inferior orbital gyrus<br>(BA 47) | 198  | -28 | 30  | -14 | 8.21  | 2.45 |
| Right frontal medial gyrus<br>(BA 32)           | 274  | -12 | 53  | 21  | 8.04  | 2.4  |
| Right frontal inferior operculum<br>(BA 44)     | 278  | -35 | 14  | 31  | 7.56  | 2.25 |

---

BA, Brodmann area; MNI, Montreal Neurological Institute coordinates

family-wise error corrected at the threshold of 0.05 for whole brain analysis

??T-value: higher T-values implicate stronger differences relative to variation.
